# Supplementary material for: Perspectives on the treatment of sequelae after cancer: protocol of an interview study of primary care physiotherapists
Source: HighWire-hosted journal article supplement (doi:10.1136/bmjopen-2021-052378), 2022-04-01
Supplement: bmjopen-2021-052378supp001_data_supplement.pdf [file bmjopen-2021-052378supp001_data_supplement.pdf]

## Additional file 1. Interview guide

| Theme                                              | Questions and information                                                                                                                                                                                                                                                                                                                                                                                                                                                                                                                                                                                                                                                                                                                                                                                                                                                                                                   |
|----------------------------------------------------|-----------------------------------------------------------------------------------------------------------------------------------------------------------------------------------------------------------------------------------------------------------------------------------------------------------------------------------------------------------------------------------------------------------------------------------------------------------------------------------------------------------------------------------------------------------------------------------------------------------------------------------------------------------------------------------------------------------------------------------------------------------------------------------------------------------------------------------------------------------------------------------------------------------------------------|
| Introduction                                       | <p>Hi, my name is [name of interviewer], and I am part of a research group that examines physiotherapists' treatment of late effects after cancer.</p> <p>First of all, I want to thank you for allowing us to talk to you about your experiences.</p>                                                                                                                                                                                                                                                                                                                                                                                                                                                                                                                                                                                                                                                                      |
| Informed Consent                                   | <p>Before we get started, I need to let you know that I record our conversation. However, only my colleagues and I within the research group will hear the recordings, and in our analysis of the interview, you will be anonymised.</p> <p>This information is also apparent from the information I have sent to you before today's sitting, but now I repeat it to make sure you agree to these terms.</p>                                                                                                                                                                                                                                                                                                                                                                                                                                                                                                                |
| Background questions regarding the physiotherapist | <p>First, I would like to ask you, how long have you been practising physiotherapy?</p> <p>How many patients do you assess weekly?</p> <p>How long have you been assessing patients suffering from long-term consequences of cancer treatment?</p>                                                                                                                                                                                                                                                                                                                                                                                                                                                                                                                                                                                                                                                                          |
| Patients characteristics                           | <p>How large a proportion of patients has long-term effects after cancer treatment out of your total number of patients?</p> <p>- Just an estimate from the top of your head?</p> <p>What symptoms or disorders are they treated for?</p> <p>- Such as pain, scar tissue, restricted movement or the like?</p>                                                                                                                                                                                                                                                                                                                                                                                                                                                                                                                                                                                                              |
| Assessment of long-term effects                    | <p>How do the patients usually find you and your skills as a physiotherapist?</p> <ul style="list-style-type: none"> <li>- Referrals? Recommendation? Other things?</li> </ul> <p>Do you feel competent in the treatment of long-term effects after cancer?</p> <ul style="list-style-type: none"> <li>- If so, what has helped you build this competence?</li> <li>- If not, what do you feel you are missing? <ul style="list-style-type: none"> <li>o What information or knowledge could help you offer the best possible treatment to your patients?</li> </ul> </li> </ul> <p>What are your thoughts on treating long-term effects of cancer being included as part of physiotherapists' basic training?</p> <ul style="list-style-type: none"> <li>- Would it be preferable if it were a course you attend yourself after graduation? <ul style="list-style-type: none"> <li>o Why / why not?</li> </ul> </li> </ul> |

|                                                |                                                                                                                                                                                                                                                                                                                                                                                                                                                                                                                                                                                                                                                                                                                                                                                                                                                                                                                                                                                                                                                                                                                                                                                                                                                                                                                                                                                                                                                                                                                                                                                                                                                                                                                   |
|------------------------------------------------|-------------------------------------------------------------------------------------------------------------------------------------------------------------------------------------------------------------------------------------------------------------------------------------------------------------------------------------------------------------------------------------------------------------------------------------------------------------------------------------------------------------------------------------------------------------------------------------------------------------------------------------------------------------------------------------------------------------------------------------------------------------------------------------------------------------------------------------------------------------------------------------------------------------------------------------------------------------------------------------------------------------------------------------------------------------------------------------------------------------------------------------------------------------------------------------------------------------------------------------------------------------------------------------------------------------------------------------------------------------------------------------------------------------------------------------------------------------------------------------------------------------------------------------------------------------------------------------------------------------------------------------------------------------------------------------------------------------------|
|                                                | <p>What are your thoughts and experiences with others in the primary sector regarding treatment op long-term effects of cancer?</p> <ul style="list-style-type: none"> <li>- What other parties do you work with?</li> <li>- Which parties would you wish you had a closer collaboration with?</li> </ul> <p>What would it look like if you could design the best possible collaboration in the primary sector in terms of long-term treatment?</p>                                                                                                                                                                                                                                                                                                                                                                                                                                                                                                                                                                                                                                                                                                                                                                                                                                                                                                                                                                                                                                                                                                                                                                                                                                                               |
| Overall barriers                               | <p>What are the most prominent barriers/issues regarding assessment/treatment of long-term consequences of cancer in your experience?</p> <ul style="list-style-type: none"> <li>- How do these problems/barriers manifest?</li> </ul> <p>What could be done to remedy these problems/barriers?</p>                                                                                                                                                                                                                                                                                                                                                                                                                                                                                                                                                                                                                                                                                                                                                                                                                                                                                                                                                                                                                                                                                                                                                                                                                                                                                                                                                                                                               |
| Verification of issues pointed out by patients | <p>Previous interviews with several patients who have undergone physiotherapeutic treatment after cancer has pointed out some late treatment problems. I would therefore like to inquire into a few things and draw on your experiences concerning the issues.</p> <p>The patients express that they must be very outreach in the course of treatment and that it can be challenging to find relevant physiotherapists.</p> <ul style="list-style-type: none"> <li>- What are your taughts on this matter? <ul style="list-style-type: none"> <li>o How do you think it would be best to remedy this problem?</li> </ul> </li> <li>- What do you thiskis is like to cooperate with othersin the primary secktor regarding long-term effects of cancer? <ul style="list-style-type: none"> <li>o What other partners do you work with?</li> <li>o What would it look like if you could design the best possible collaboration (/course) in the primary sector in terms of long-term treatment?</li> </ul> </li> </ul> <p>Several patients were surprised that cancer's long-term effects are not taught in the physiotherapist primary education, even though many Danes undergo a cancer course in their lifetime.</p> <ul style="list-style-type: none"> <li>- Would it be relevant, from your perspective, to incorporate treatment of long-term effects of cancer as part of the primary education, or should it be a course you must seek out yourself after completing your education? <ul style="list-style-type: none"> <li>o What ought to be taught?</li> <li>o What knowledge and abilities do you lack as a newly trained physiotherapist to assess cancer's long-term effects?</li> </ul> </li> </ul> |
| <b>Closing</b>                                 |                                                                                                                                                                                                                                                                                                                                                                                                                                                                                                                                                                                                                                                                                                                                                                                                                                                                                                                                                                                                                                                                                                                                                                                                                                                                                                                                                                                                                                                                                                                                                                                                                                                                                                                   |
| Rounding/validation of findings                | <p>To summarise our conversation/this interview, I have heard you say that..... represent a potential for a change in your objective.</p> <ul style="list-style-type: none"> <li>- Is that correctly understood?</li> <li>- Is there anything you would like to add?</li> <li>- <i>Then I would like to end our conversation by saying thank you for your participation in the interview.</i></li> </ul>                                                                                                                                                                                                                                                                                                                                                                                                                                                                                                                                                                                                                                                                                                                                                                                                                                                                                                                                                                                                                                                                                                                                                                                                                                                                                                          |

|  |  |
|--|--|
|  |  |
|--|--|
